# Supplementary material
Source: Springer Nature journal article supplement (https://www.springermedizin.de/resource/supplementary/12891_2007_455_MOESM7_ESM.pdf/9511468)
Supplement: MOESM7 [file 9511468]

**Difference between the two observations**

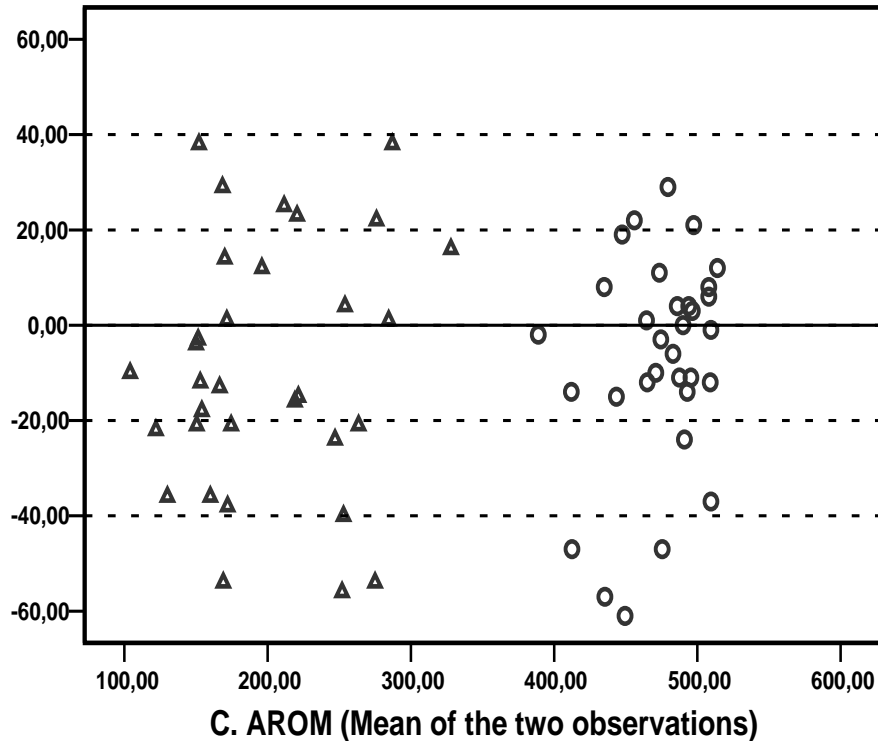

△ Affected side  
○ Non-affected side

**C. AROM (Mean of the two observations)**
